# Supplementary material for: Understanding the composition and spatial distribution of biological selenate reduction products for potential selenium recovery
Source: Royal Society of Chemistry journal article supplement (doi:10.1039/d0ew00376j), 2020-01-01
Supplement: d0ew00376j1.pdf [file d0ew00376j1.pdf]

## Supporting Information

for

Understanding the Composition and Spatial Distribution of Biological Selenate Reduction

Products for Potential Selenium Recovery

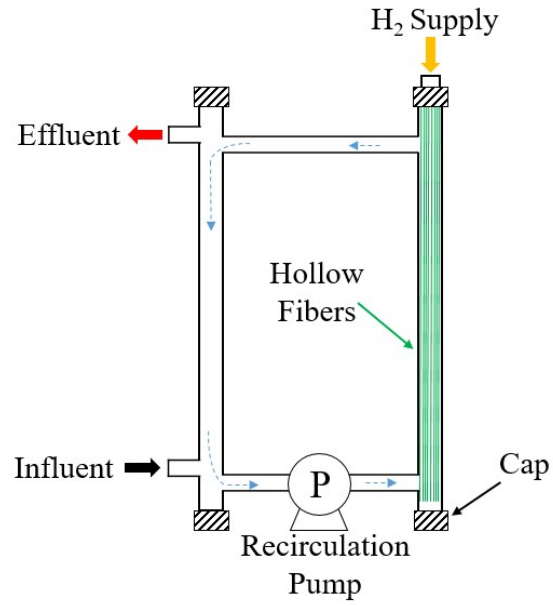

Figure S1. A schematic image of the H<sub>2</sub>-based membrane biofilm reactor (MBfR)

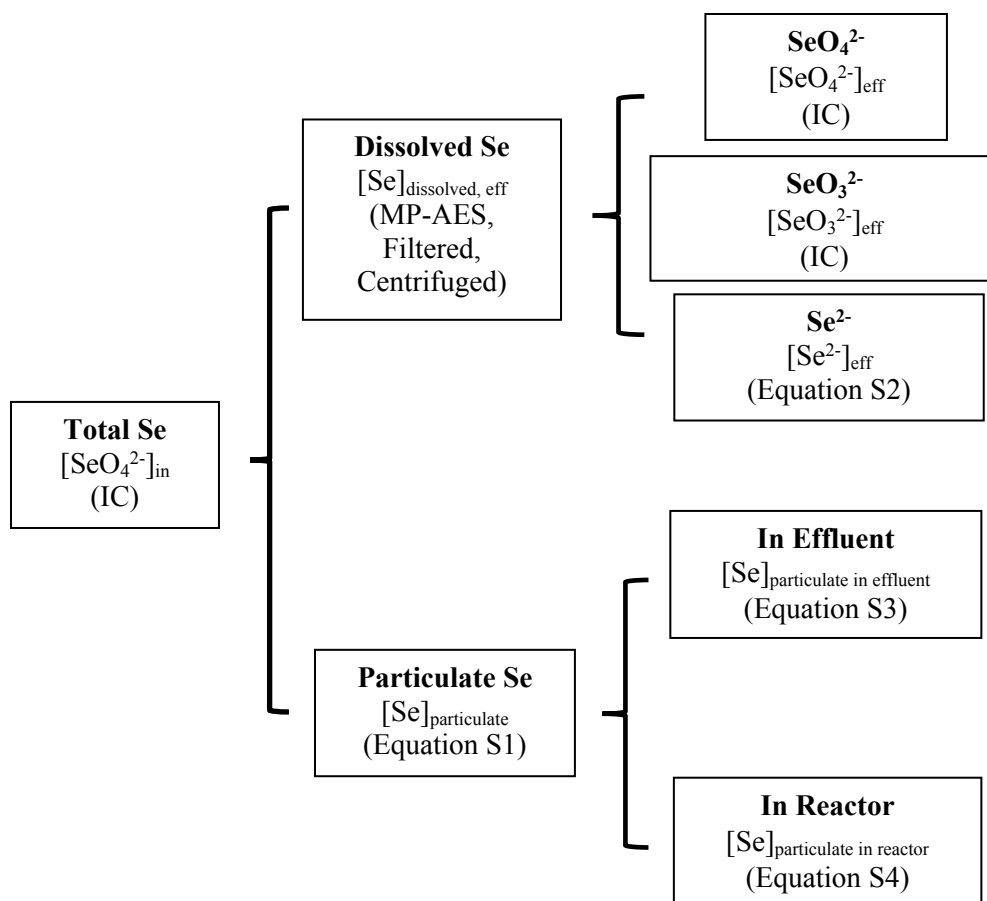

Figure S2. Methods for selenium speciation

**Notes:**

- 1) Equation S1:  $[\text{Se}]_{\text{particulate}} = [\text{SeO}_4^{2-}]_{\text{in}} - [\text{Se}]_{\text{dissolved, eff}}$   
 Equation S2:  $[\text{Se}^{2-}]_{\text{eff}} = [\text{Se}]_{\text{dissolved, eff}} - [\text{SeO}_4^{2-}]_{\text{eff}} - [\text{SeO}_3^{2-}]_{\text{eff}}$   
 Equation S3:  $[\text{Se}]_{\text{particulate in effluent}} = \text{total selenium in the effluent sample (measured by Microwave Plasma-Atomic Emission Spectrometer, model 4100 MP-AES, Agilent Technologies, USA) - total selenium in the effluent sample after the sample was centrifuged at 21,000 rcf for 30 min and then filtered by a 20 nm-pore size syringe filter.}$   
 Equation S4:  $[\text{Se}]_{\text{particulate in reactor}} = [\text{Se}]_{\text{particulate}} - [\text{Se}]_{\text{particulate in effluent}}$
- 2) IC: Ion Chromatography; MP-AES: Microwave Plasma-Atomic Emission Spectrometer.

**Table S1. Operating conditions for the three stages**

| <b>Stage</b> | <b>Flow rate<br/>(mL/day)</b> | <b>HRT<br/>(day)</b> | <b>Influent<br/>SeO<sub>4</sub><sup>2-</sup><br/>concentration<br/>(mg Se/L)</b> | <b>SeO<sub>4</sub><sup>2-</sup> loading<br/>rate<br/>(mg Se/m<sup>2</sup>-day)</b> | <b>Influent<br/>SO<sub>4</sub><sup>2-</sup><br/>concentration<br/>(mg S/L)</b> | <b>SO<sub>4</sub><sup>2-</sup><br/>loading rate<br/>(g S/m<sup>2</sup>-day)</b> |
|--------------|-------------------------------|----------------------|----------------------------------------------------------------------------------|------------------------------------------------------------------------------------|--------------------------------------------------------------------------------|---------------------------------------------------------------------------------|
| 1            | 107                           | 0.28                 | 4.2                                                                              | 285                                                                                | 1,500                                                                          | 102                                                                             |
| 2            | 214                           | 0.14                 | 4.2                                                                              | 570                                                                                | 1,500                                                                          | 204                                                                             |
| 3            | 428                           | 0.07                 | 4.2                                                                              | 1,140                                                                              | 1,500                                                                          | 407                                                                             |

## H<sub>2</sub> supply and consumption analysis for the three stages:

The theoretical maximum H<sub>2</sub> supply rate was approximately 220 mg H<sub>2</sub>/m<sup>2</sup>-day based on Tang, et al. (2012),<sup>1</sup> considering that polypropylene fibers were used in this study and the H<sub>2</sub> pressure was 5 psig.

Accurate calculation of the H<sub>2</sub> consumption requires the knowledge on the percentages of selenate reduced to Se<sup>0</sup> and selenium sulfides, respectively. This knowledge was available in stage 1 since all selenate was reduced to Se<sup>0</sup>. However, this information could not be determined in stages 2 and 3. Therefore, two extreme scenarios were used to estimate the H<sub>2</sub> consumption range in stages 2 and 3. In the first scenario, Se<sup>0</sup> was assumed to be the only particulate selenium product, and the corresponding reactions were S1, S2, and S3. In the second scenario, selenium sulfide was assumed to be the only particulate selenium product, and the corresponding reactions were S2, S3, and S4 for stage 2 (or S5 for stage 3). Equations S1-S3 were based on the stoichiometric method in Rittmann and McCarty (2012),<sup>2</sup> Equation S4 was based on the typical Se:S ratio in 60 EDX spectra of the selenium sulfides in the stage 2 effluent, and Equation S5 was based on the typical Se:S ratio in 35 EDX spectra of the selenium sulfides in the stage 3 effluent.

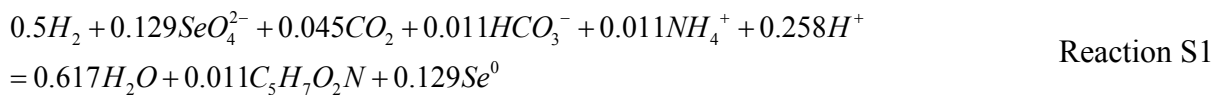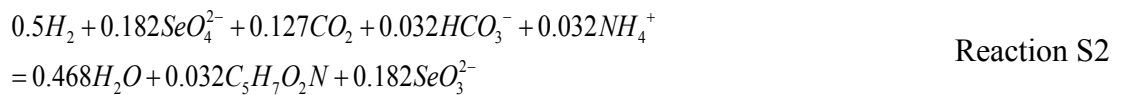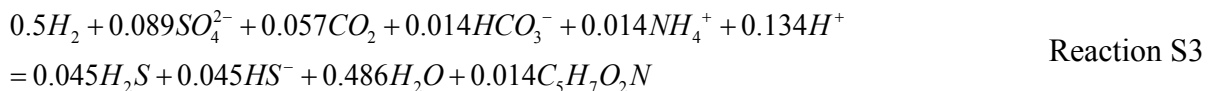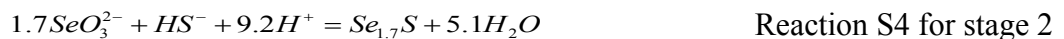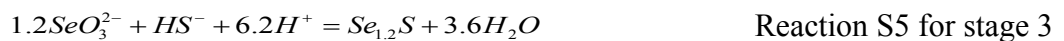

The estimated H<sub>2</sub> consumption for the three stages are summarized in Table S2. The estimated H<sub>2</sub> consumption for stage 1 was approximate 33 mg H<sub>2</sub>/m<sup>2</sup>-day (Table S2). The estimated H<sub>2</sub> consumption for stage 2 might range from 57 to 127 mg H<sub>2</sub>/m<sup>2</sup>-day, and the range of H<sub>2</sub> consumption for stage 3 might range from 105 to 219 mg H<sub>2</sub>/m<sup>2</sup>-day.

**Table S2. Estimated H<sub>2</sub> consumption at the three stages when they reached steady state**

| Stage | Scenario       | Reactions | SeO <sub>4</sub> <sup>2-</sup> or SO <sub>4</sub> <sup>2-</sup> reduction (mg Se or S/L) | H <sub>2</sub> consumption flux by reactions (mg H <sub>2</sub> /m <sup>2</sup> -day) | Total H <sub>2</sub> consumption flux (mg H <sub>2</sub> /m <sup>2</sup> -day) |
|-------|----------------|-----------|------------------------------------------------------------------------------------------|---------------------------------------------------------------------------------------|--------------------------------------------------------------------------------|
| 1     | 1              | S1        | 4.1 mg Se/L <sup>2</sup>                                                                 | 27 <sup>6</sup>                                                                       | 33                                                                             |
|       |                | S2        | 0 mg Se/L <sup>2</sup>                                                                   | 0 <sup>7</sup>                                                                        |                                                                                |
|       |                | S3        | 0.25 mg S/L <sup>3</sup>                                                                 | 6.0 <sup>8</sup>                                                                      |                                                                                |
| 2     | 1 <sup>1</sup> | S1        | 4.0 mg Se/L <sup>2</sup>                                                                 | 53                                                                                    | 57                                                                             |
|       |                | S2        | 0.1 mg Se/L <sup>2</sup>                                                                 | 2                                                                                     |                                                                                |
|       |                | S3        | 0.05 mg S/L <sup>3</sup>                                                                 | 2                                                                                     |                                                                                |
|       | 2 <sup>1</sup> | S2        | 4.0 mg Se/L <sup>2</sup>                                                                 | 79                                                                                    | 127                                                                            |
|       |                | S3        | 1.0 mg S/L <sup>4</sup>                                                                  | 48                                                                                    |                                                                                |
|       |                | S4        | Did not consume H <sub>2</sub>                                                           |                                                                                       |                                                                                |
| 3     | 1 <sup>1</sup> | S1        | 2.7 mg Se/L <sup>2</sup>                                                                 | 72                                                                                    | 105                                                                            |
|       |                | S2        | 1.5 mg Se/L <sup>2</sup>                                                                 | 28                                                                                    |                                                                                |
|       |                | S3        | 0.05 mg S/L <sup>3</sup>                                                                 | 5                                                                                     |                                                                                |
|       | 2 <sup>1</sup> | S2        | 4.2 <sup>2</sup>                                                                         | 79                                                                                    | 219                                                                            |
|       |                | S3        | 1.5 <sup>5</sup>                                                                         | 140                                                                                   |                                                                                |
|       |                | S5        | Did not consume H <sub>2</sub>                                                           |                                                                                       |                                                                                |

Notes:

1. In Scenario 1 Se<sup>0</sup> was assumed to be the only particulate selenium product, and in Scenario 2, selenium sulfides (Se<sub>1.7</sub>S for stage 2, and Se<sub>1.2</sub>S for stage 3) was assumed to be the only particulate selenium product.
2. Values were obtained from Figure 1.
3. Values were obtained from Table 1.
4. The values were based on the following stoichiometry: 1) 4.0 mg Se<sub>1.7</sub>S-Se/L produced in Reaction S4 → 0.95 mg SO<sub>4</sub><sup>2-</sup>-S/L reduction in Reaction S3, 2) 0.05 mg SO<sub>4</sub><sup>2-</sup>-S/L reduction in Reaction S3 as dissolved sulfide in effluent.

5. The values were based on the following stoichiometry: 1) 4.2 mg  $\text{Se}_{1.2}\text{S-Se/L}$  produced in Reaction S5  $\rightarrow$  1.42 mg  $\text{SO}_4^{2-}\text{-S/L}$  reduction in Reaction S3, 2) 0.05 mg  $\text{SO}_4^{2-}\text{-S/L}$  reduction in Reaction S3 as dissolved sulfide in effluent.

6. For Reaction S1, the required  $\text{H}_2$  was  $\frac{(0.5 \times 2) \text{g H}_2 \times 4.1 \text{mg Se/L}}{0.129 \times 79 \text{g Se}} = 0.4 \text{mg H}_2/\text{L}$ . The Required  $\text{H}_2$  flux was

$\frac{0.4 \text{mg H}_2/\text{L} \times \text{Q}}{\text{A}} = 27 \text{mg H}_2/\text{m}^2\text{-day}$ , where Q is the flow rate (*i.e.*, 107 mL/day) and A is the membrane surface area (*i.e.*,  $1.57 \times 10^{-3} \text{ m}^2$ ).

7. For Reaction S2, the required  $\text{H}_2$  was  $\frac{(0.5 \times 2) \text{g H}_2 \times 0 \text{mg Se/L}}{0.182 \times 79 \text{g Se}} = 0 \text{mg H}_2/\text{L}$ . The Required  $\text{H}_2$  flux was

$\frac{0 \text{mg H}_2/\text{L} \times \text{Q}}{\text{A}} = 0 \text{mg H}_2/\text{m}^2\text{-day}$ .

8. For Reaction S3, the required  $\text{H}_2$  was  $\frac{(0.5 \times 2) \text{g H}_2 \times 0.25 \text{mg S/L}}{0.089 \times 32 \text{g S}} = 0.088 \text{mg H}_2/\text{L}$ . The Required  $\text{H}_2$  flux

was  $\frac{0.088 \text{mg H}_2/\text{L} \times \text{Q}}{\text{A}} = 6 \text{mg H}_2/\text{m}^2\text{-day}$ .

## References

1. B.E. Rittmann and P.L. McCarty. Environmental biotechnology: principles and applications. Tata McGraw-Hill Education. 2012.
2. Y. Tang, C. Zhou, S.W. Van Ginkel, A. Ontiveros-Valencia, J. Shin and B.E. Rittmann. Hydrogen permeability of the hollow fibers used in H<sub>2</sub>-based membrane biofilm reactors. *J. Membr. Sci.* 2012, 407-408, 176-183. doi: 10.1016/j.memsci.2012.03.040
